# Supplementary material
Source: Royal Society of Chemistry journal article supplement (doi:10.1039/d5me00167f)
Supplement: d5me00167f1.pdf [file d5me00167f1.pdf]

## SUPPORTING INFORMATION

### Effect of the donor component nature on the extraction ability of a tributyl phosphate-based deep eutectic solvent

N.A. Milevskii<sup>1</sup>, A.V. Milevskaya<sup>1</sup>, V.E. Maltseva<sup>1,2</sup>, I.V. Ananyev<sup>1</sup>, D.D. Borisov<sup>3</sup>, A.E. Eremchenko<sup>1</sup>, Yu.A. Zakhodyaeva<sup>1</sup>, A.A. Voshkin<sup>1,\*</sup>

<sup>1</sup>Kurnakov Institute of General and Inorganic Chemistry, Russian Academy of Sciences, 31 Leninsky Prospect, Moscow 119991, Russia

<sup>2</sup>National Research University Higher School of Economics, 20 Myasnitskaya Str., Moscow 101000, Russia

<sup>3</sup>N. D. Zelinsky Institute of Organic Chemistry, Russian Academy of Sciences, 47 Leninsky Prospect, Moscow 119991, Russia

\*Corresponding author. E-mail address: aav@igic.ras.ru (A.A. Voshkin).

#### Table of Contents

|                                                        |   |
|--------------------------------------------------------|---|
| Data of extraction experiments .....                   | 2 |
| FT-IR spectra .....                                    | 4 |
| <sup>1</sup> H, <sup>1</sup> H-NOESY NMR spectra ..... | 6 |
| Born-Oppenheimer molecular dynamics .....              | 7 |
| Combined DFT+D and DLPNO-CCSD calculations .....       | 9 |

## Data of extraction experiments

**Table S1.** Extraction of Zr(IV) as a function of phase contact time.

Conditions:  $[\text{HCl}]_0 = 6.5 \text{ mol/L}$ ,  $[\text{Zr(IV)}]_0 = 0.004 \text{ mol/L}$ ,  $V_{\text{aq}} = V_{\text{org}}$ ,  $T = 25^\circ\text{C}$ .

|            | TBP/Ph        | TBP/Thy       | TBP/PTBP      | TBP/BHT       | TBP/Men       |
|------------|---------------|---------------|---------------|---------------|---------------|
| Time (min) | E (%) / D     |
| 1          | 15.67 / 0.186 | 44.06 / 0.788 | 34.89 / 0.536 | 60.56 / 1.535 | 21.54 / 0.274 |
| 3          | 43.21 / 0.761 | 63.45 / 1.736 | 54.61 / 1.203 | 79.87 / 3.968 | 27.67 / 0.383 |
| 5          | 58.76 / 1.425 | 72.45 / 2.63  | 65.73 / 1.918 | 81.02 / 4.269 | 30.23 / 0.433 |
| 10         | 65.74 / 1.919 | 76.64 / 3.28  | 68.99 / 2.225 | 81.23 / 4.328 | 30.56 / 0.440 |
| 30         | 67.56 / 2.083 | 78.65 / 3.684 | 70.34 / 2.372 | 81.67 / 4.456 | 30.36 / 0.436 |
| 60         | 67.46 / 2.073 | 79.13 / 3.792 | 71.1 / 2.46   | 82.45 / 4.698 | 30.66 / 0.442 |

**Table S2.** Extraction of Zr(IV) as a function of initial HCl concentration.

Conditions:  $[\text{Zr(IV)}]_0 = 0.004 \text{ mol/L}$ ,  $V_{\text{aq}} = V_{\text{org}}$ , phase contact time = 10 min,  $25^\circ\text{C}$ .

|                               | TBP/Ph        | TBP/Thy       | TBP/PTBP      | TBP/BHT       | TBP/Men       |
|-------------------------------|---------------|---------------|---------------|---------------|---------------|
| $C(\text{HCl})_{\text{init}}$ | E (%) / D     |
| 4.5                           | 0 / 0         | 0 / 0         | 0 / 0         | 0 / 0         | 0 / 0         |
| 5                             | 2.68 / 0.028  | 5.36 / 0.057  | 4.46 / 0.047  | 4.91 / 0.052  | 0 / 0         |
| 5.5                           | 8.48 / 0.093  | 17.86 / 0.217 | 14.29 / 0.167 | 14.29 / 0.167 | 0 / 0         |
| 5.75                          | 18.3 / 0.224  | 23.21 / 0.302 | 20.54 / 0.258 | 20.54 / 0.258 | 1.34 / 0.014  |
| 6                             | 26.34 / 0.358 | 34.6 / 0.529  | 29.69 / 0.422 | 35.71 / 0.555 | 5.36 / 0.057  |
| 6.5                           | 64.56 / 1.822 | 78.65 / 3.684 | 70.34 / 2.372 | 81.67 / 4.456 | 30.56 / 0.44  |
| 6.75                          | 80.65 / 4.168 | 89 / 8.091    | 82.34 / 4.663 | 89.56 / 8.579 | 40.23 / 0.673 |
| 7                             | 87.5 / 7.0    | 93.67 / 14.80 | 89.21 / 8.27  | 94.54 / 17.32 | 52.232 / 1.09 |
| 7.5                           | 95.7 / 22.25  | 97.59 / 40.49 | 96.16 / 25.04 | 97.41 / 37.61 | 76.12 / 3.188 |

**Table S3.** Extraction of Zr(IV) as a function of  $\text{H}^+$  concentration at constant  $[\text{Cl}^-] = 6.5 \text{ mol/L}$

Conditions:  $[\text{Cl}^-] = 6.5 \text{ mol/L}$  (LiCl + HCl),  $[\text{Zr(IV)}]_0 = 0.004 \text{ mol/L}$ ,  $V_{\text{aq}} = V_{\text{org}}$ , phase contact time = 10 min,  $25^\circ\text{C}$ .

|                               | TBP/Ph        | TBP/Thy       | TBP/PTBP      | TBP/BHT       | TBP/Men       |
|-------------------------------|---------------|---------------|---------------|---------------|---------------|
| $C(\text{H}^+)_{\text{init}}$ | E (%) / D     |
| 0                             | 0 / 0         | 0 / 0         | 0 / 0         | 0 / 0         | 0 / 0         |
| 0.1                           | 16.98 / 0.205 | 6.98 / 0.075  | 12.79 / 0.147 | 6.28 / 0.067  | 24.88 / 0.331 |
| 0.25                          | 30 / 0.429    | 22.09 / 0.284 | 23.72 / 0.311 | 11.63 / 0.132 | 51.63 / 1.067 |
| 0.5                           | 49.77 / 0.991 | 41.86 / 0.720 | 45.12 / 0.822 | 30.23 / 0.433 | 66.98 / 2.03  |
| 0.75                          | 72.09 / 2.583 | 64.19 / 1.792 | 64.42 / 1.81  | 53.72 / 1.161 | 90.7 / 9.75   |
| 1                             | 75.58 / 3.095 | 75.81 / 3.134 | 72.09 / 2.583 | 66.74 / 2.01  | 90.05 / 9.05  |
| 1.5                           | 75.72 / 3.119 | 80 / 4.0      | 73.02 / 2.706 | 73.67 / 2.798 | 86.51 / 6.413 |
| 2                             | 74.88 / 2.981 | 80.09 / 4.023 | 73.3 / 2.745  | 76.65 / 3.283 | 83.16 / 4.94  |
| 4                             | 72.65 / 2.656 | 79.91 / 3.978 | 72.33 / 2.614 | 80.28 / 4.071 | 61.4 / 1.591  |
| 6                             | 70.88 / 2.434 | 79.07 / 3.778 | 70.42 / 2.381 | 80.37 / 4.094 | 37.67 / 0.604 |

**Table S4.** Extraction of Zr(IV) as a function of  $\text{Cl}^-$  concentration at constant  $[\text{H}^+] = 1 \text{ mol/L}$

Conditions:  $[\text{H}^+] = 1 \text{ mol/L}$  (HCl + LiCl to adjust  $\text{Cl}^-$ ),  $[\text{Zr(IV)}]_0 = 0.004 \text{ mol/L}$ ,  $V_{\text{aq}} = V_{\text{org}}$ , phase contact time = 10 min,  $25^\circ\text{C}$ .

|                                | TBP/Ph    | TBP/Thy   | TBP/PTBP  | TBP/BHT   | TBP/Men   |
|--------------------------------|-----------|-----------|-----------|-----------|-----------|
| $C(\text{Cl}^-)_{\text{init}}$ | E (%) / D |

|      |                |                |               |                |               |
|------|----------------|----------------|---------------|----------------|---------------|
| 5    | 0.68 / 0.007   | 1.13 / 0.011   | 0.9 / 0.009   | 0.9 / 0.009    | 4.75 / 0.050  |
| 5.5  | 9.28 / 0.102   | 7.69 / 0.083   | 7.99 / 0.087  | 3.39 / 0.035   | 26.24 / 0.356 |
| 5.75 | 14.93 / 0.176  | 13.12 / 0.151  | 12.67 / 0.145 | 5.43 / 0.057   | 38.24 / 0.619 |
| 6    | 26.92 / 0.368  | 24.66 / 0.327  | 23.76 / 0.312 | 14.03 / 0.163  | 57.47 / 1.351 |
| 6.5  | 64.71 / 1.834  | 65.32 / 1.884  | 60.18 / 1.511 | 57.47 / 1.351  | 79.64 / 3.912 |
| 6.75 | 85.16 / 5.739  | 86.99 / 6.686  | 84.16 / 5.313 | 83.71 / 5.139  | 92.85 / 12.99 |
| 7    | 91.86 / 11.285 | 92.49 / 12.316 | 91.4 / 10.628 | 91.95 / 11.422 | 95.11 / 19.45 |
| 7.5  | 96.47 / 27.329 | 96.47 / 27.329 | 96.2 / 25.31  | 97.01 / 32.445 | —             |
| 8    | 100 / —        | 100 / —        | 100 / —       | 100 / —        | —             |

**Table S5.** Extraction of HCl as a function of equilibrium HCl concentration

Conditions:  $V_{aq} = V_{org}$ , phase contact time = 10 min,  $T = 25^{\circ}\text{C}$ .

| TBP/Ph |              | TBP/Thy |               | TBP/PTBP |               | TBP/BHT |               | TBP/Men |               |
|--------|--------------|---------|---------------|----------|---------------|---------|---------------|---------|---------------|
| [HCl]  | E (%) / D    | [HCl]   | E (%) / D     | [HCl]    | E (%) / D     | [HCl]   | E (%) / D     | [HCl]   | E (%) / D     |
| 3.24   | 0 / 0        | 3.22    | 0 / 0         | 3.22     | 0 / 0         | 3.22    | 0 / 0         | 3.2     | 1.27 / 0.0129 |
| 5.3    | 0 / 0        | 5.24    | 0 / 0         | 5.24     | 0 / 0         | 5.2     | 0 / 0         | 5.02    | 8.29 / 0.0904 |
| 6.24   | 1.89 / 0.019 | 6.3     | 0.94 / 0.0095 | 6.28     | 1.26 / 0.0128 | 6.04    | 0.33 / 0.0033 | 5.88    | 16.79 / 0.202 |
| 7.44   | 3.02 / 0.031 | 7.34    | 1.87 / 0.019  | 7.3      | 2.41 / 0.0247 | 7.1     | 1.25 / 0.0127 | 6.74    | 22.28 / 0.287 |

**Table S6.** Extraction of Zr(IV) as a function of TBP mole fraction in HDES

Conditions:  $[\text{HCl}]_0 = 6.5 \text{ mol/L}$ ,  $[\text{Zr(IV)}]_0 = 0.004 \text{ mol/L}$ ,  $V_{aq} = V_{org}$ , phase contact time = 10 min,  $T = 25^{\circ}\text{C}$ .

|                    | TBP/Ph        | TBP/Thy       | TBP/PTBP      | TBP/BHT       | TBP/Men        |
|--------------------|---------------|---------------|---------------|---------------|----------------|
| $\chi(\text{TBP})$ | E (%) / D      |
| 0.1                | 7.25 / 0.078  | —             | —             | —             | —              |
| 0.2                | 27.05 / 0.371 | 8.91 / 0.098  | —             | —             | 36.63 / 0.578  |
| 0.3                | 35.89 / 0.560 | 12.87 / 0.148 | —             | —             | 74.58 / 2.934  |
| 0,35               | —             | —             | 24.75 / 0.329 | —             | —              |
| 0.4                | 43.32 / 0.764 | 20.80 / 0.263 | 32.87 / 0.490 | 21.05 / 0.267 | 76.9 / 3.329   |
| 0.5                | 65.79 / 1.923 | 59.01 / 1.440 | 58.91 / 1.434 | 44.94 / 0.816 | 79.76 / 3.941  |
| 0.6                | 86.63 / 6.479 | 89.60 / 8.615 | 86.26 / 6.278 | 78.59 / 3.671 | 91.88 / 11.315 |
| 0.7                | 90.79 / 9.858 | 91.78 / 11.17 | 90.40 / 9.417 | 87.72 / 7.143 | 93.47 / 14.314 |
| 0.8                | 92.18 / 11.79 | 93.07 / 13.43 | 92.28 / 11.95 | 90.79 / 9.858 | 93.96 / 15.56  |
| 0.9                | 92.97 / 13.23 | 93.76 / 15.03 | 92.97 / 13.22 | 92.38 / 12.12 | 94.55 / 17.35  |

**Table S7.** Extraction of Zr(IV) as a function of aqueous/organic phase volume ratio

Conditions:  $[\text{HCl}]_0 = 6.5 \text{ mol/L}$ ,  $[\text{Zr(IV)}]_0 = 0.004 \text{ mol/L}$ , phase contact time = 10 min,  $T = 25^{\circ}\text{C}$ .

|                          | TBP/Ph        | TBP/Thy       | TBP/PTBP      | TBP/BHT       | TBP/Men       |
|--------------------------|---------------|---------------|---------------|---------------|---------------|
| $V_{aq}/V_{\text{HDES}}$ | E (%) / D     |
| 1                        | 64.06 / 1.78  | 78.77 / 3.71  | 70.31 / 2.368 | 81.03 / 4.272 | 30.80 / 0.445 |
| 3                        | 36.22 / 1.704 | 50.10 / 3.012 | 43.88 / 2.346 | 54.76 / 3.631 | 24.23 / 0.959 |
| 5                        | 26.02 / 1.759 | 41.07 / 3.485 | 32.38 / 2.395 | 45.40 / 4.158 | 17.09 / 1.031 |

## FT-IR spectra

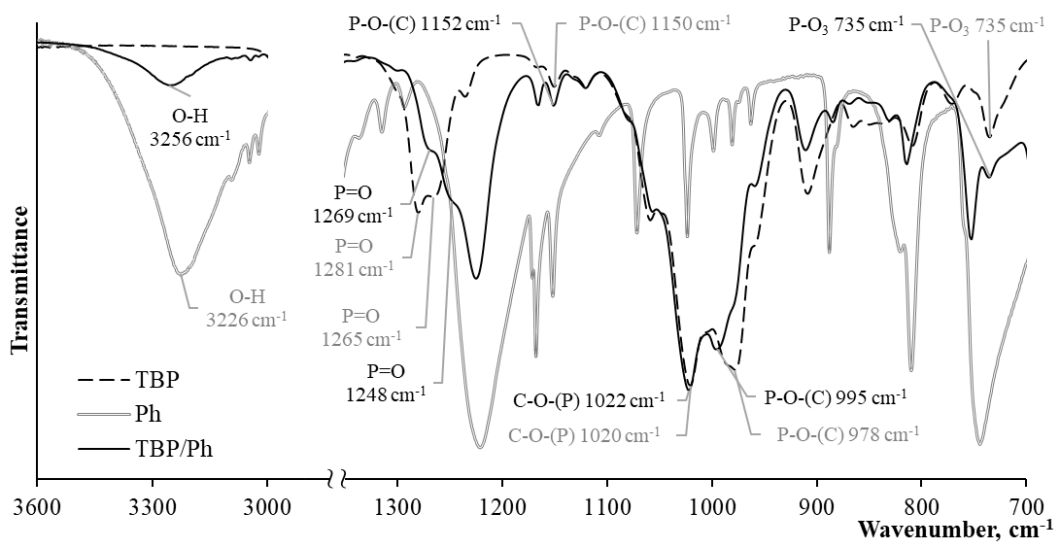

Fig. S1. FT-IR spectra of HDES TBP/Ph.

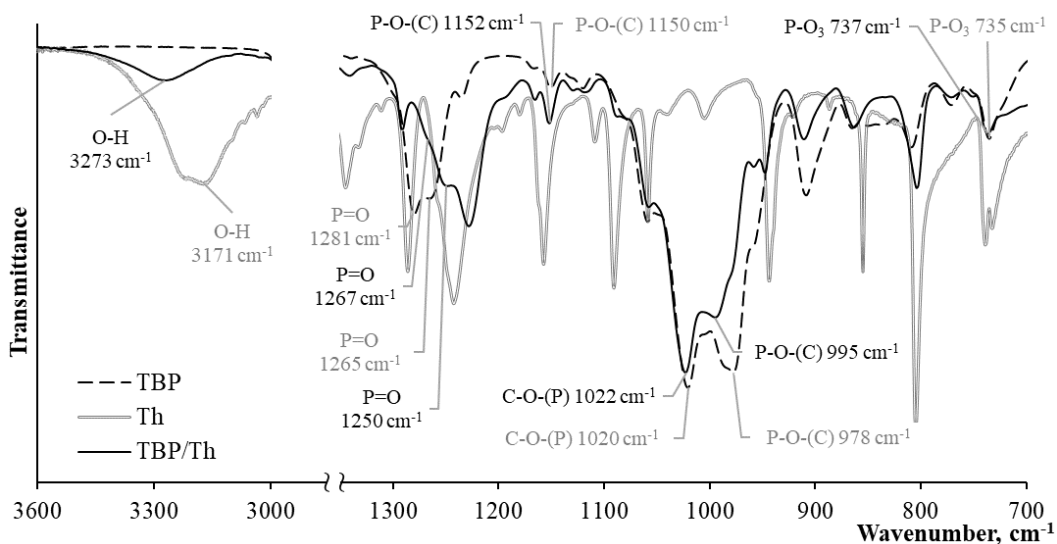

Fig. S2. FT-IR spectra of HDES TBP/Th.

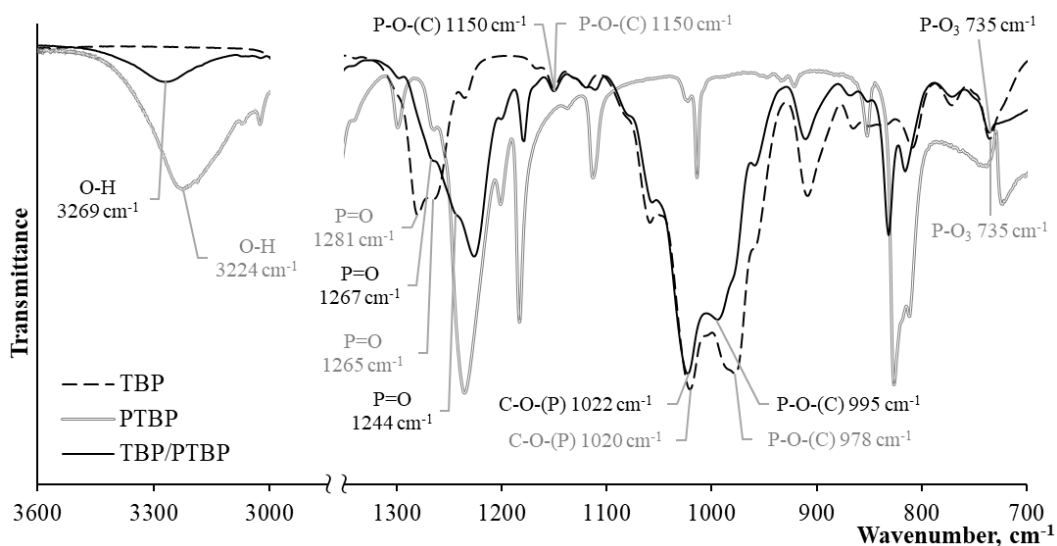

**Fig. S3.** FT-IR spectra of HDES TBP/PTBP.

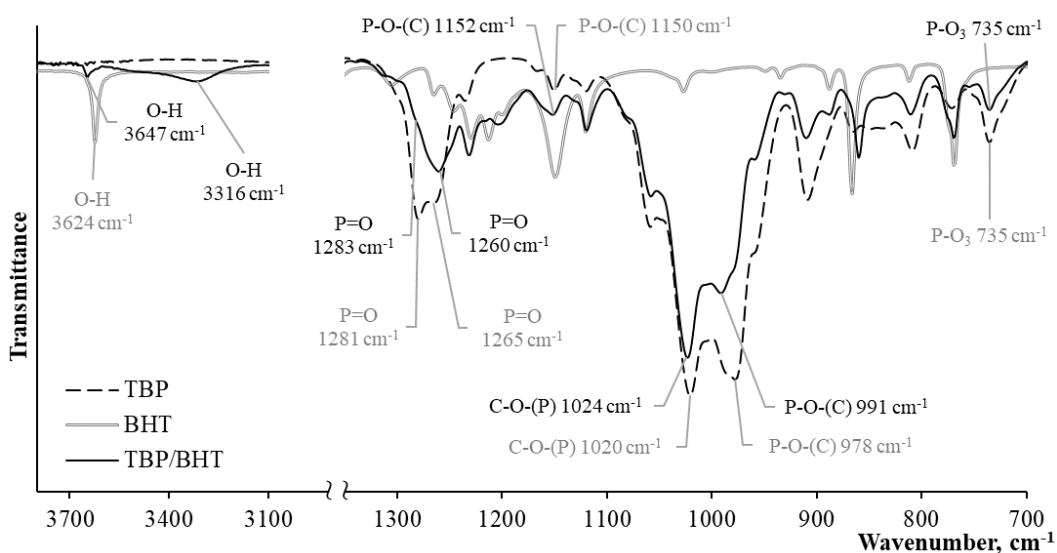

**Fig. S4.** FT-IR spectra of HDES TBP/BHT.

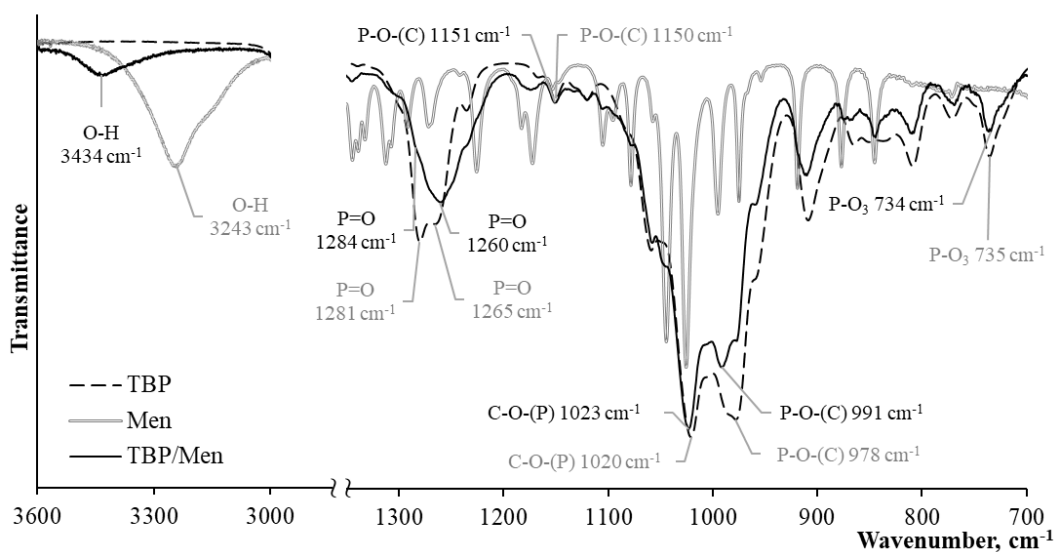

**Fig. S5.** FT-IR spectra of HDES TBP/Men.

## $^1\text{H}, ^1\text{H}$ -NOESY NMR spectra

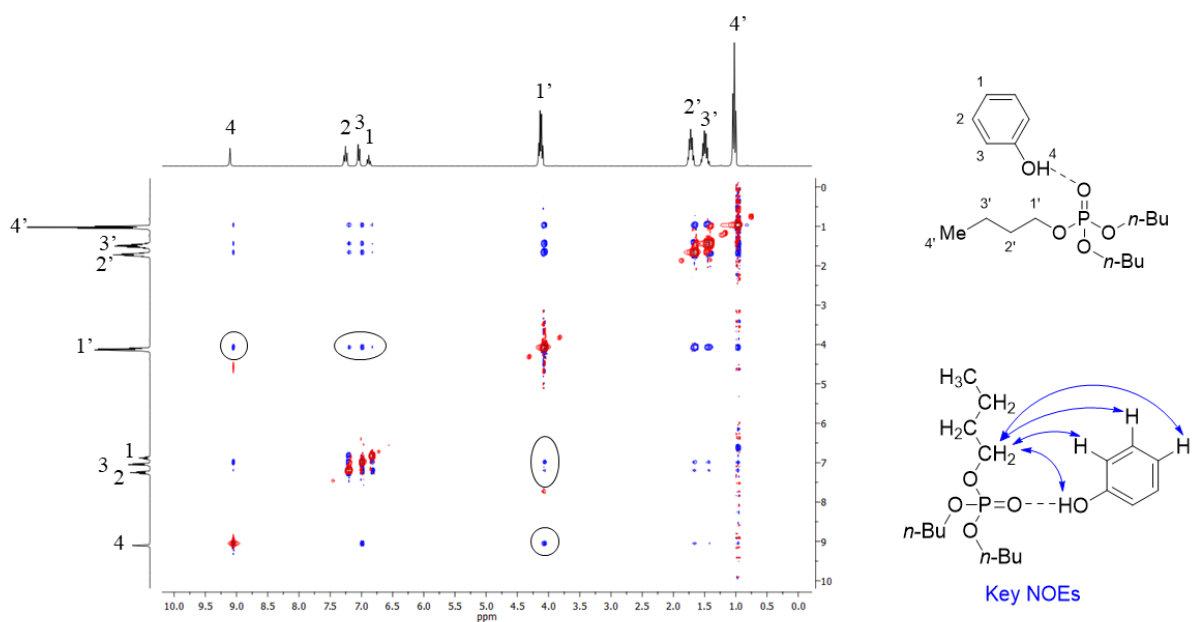

**Fig. S6.**  $^1\text{H}, ^1\text{H}$ -NOESY spectra of HDES TBP/Ph

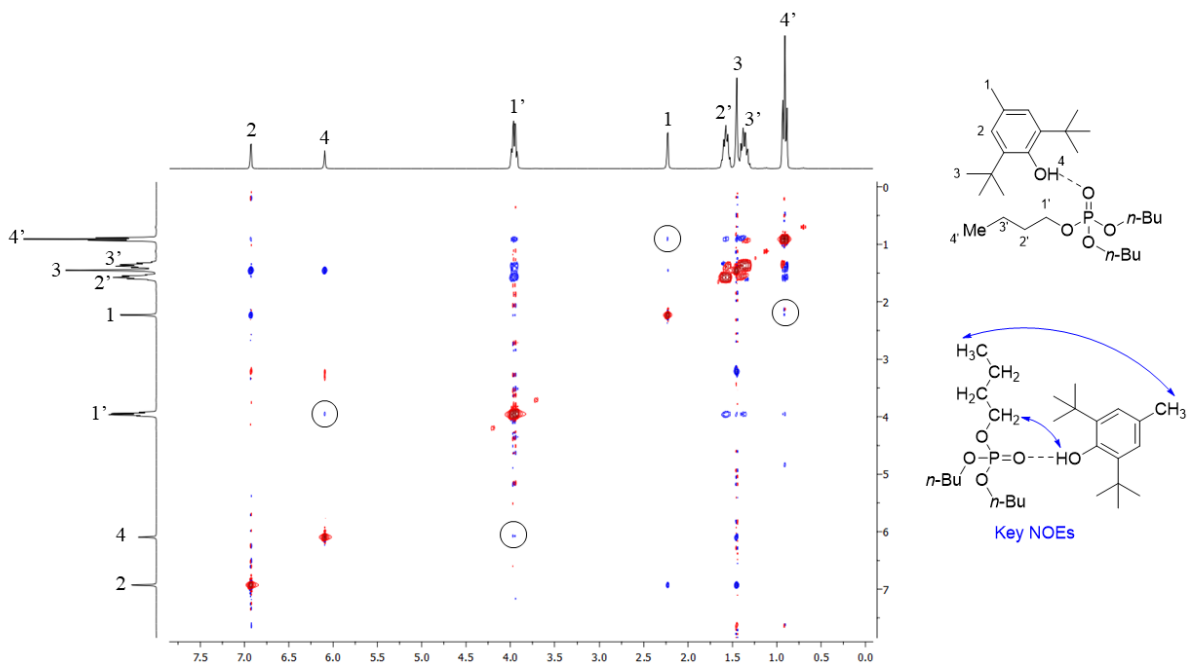

**Fig. S7.**  $^1\text{H}, ^1\text{H}$ -NOESY spectra of HDES TBP/BHT

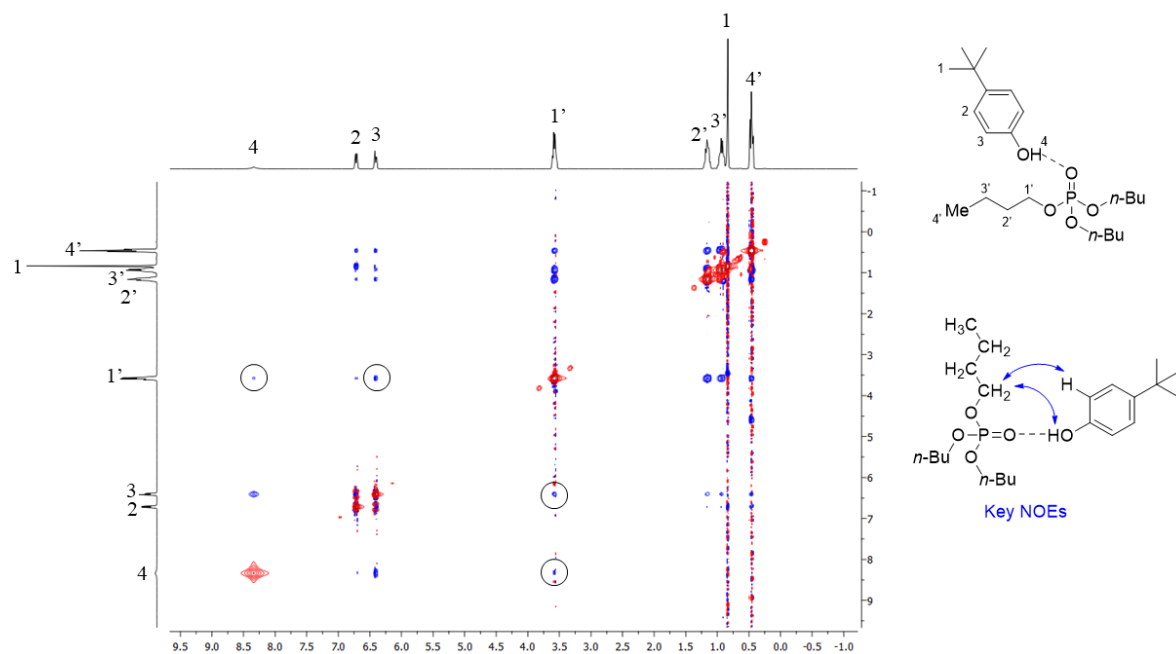

**Fig. S8.**  $^1\text{H}, ^1\text{H}$ -NOESY spectra of HDES TBP/PTBP

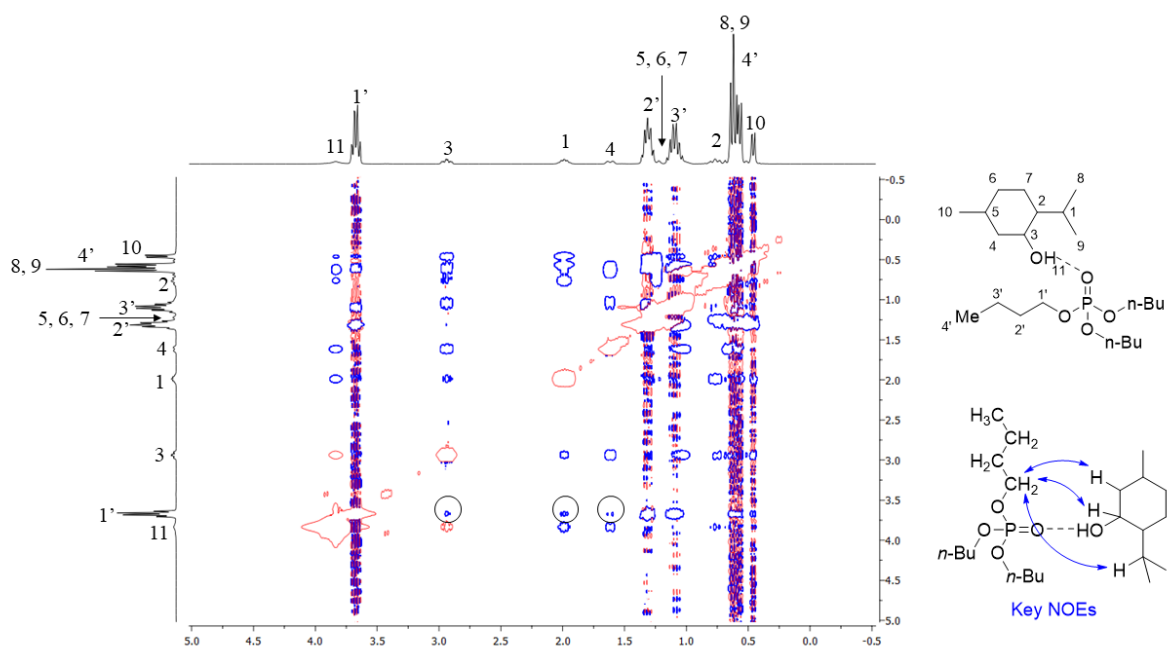

**Fig. S9.**  $^1\text{H}, ^1\text{H}$ -NOESY spectra of HDES TBP/Men

### Born-Oppenheimer molecular dynamics

**Table S8.** The average number of selected types of hydrogen bonds.

| Formal type of the associate (Ph)         | $N_{\text{HB}}$ | Formal type of the associate (Thy)         | $N_{\text{HB}}$ |
|-------------------------------------------|-----------------|--------------------------------------------|-----------------|
| $-\text{OH}\dots\text{O}=\text{(Ph/TBP)}$ | 3.87            | $-\text{OH}\dots\text{O}=\text{(Thy/TBP)}$ | 4.08            |
| $-\text{OH}\dots\text{O}-\text{(Ph/TBP)}$ | 0.18            | $-\text{OH}\dots\text{O}-\text{(Thy/TBP)}$ | 0.03            |
| Ph/Ph                                     | 0.42            | Thy/Thy                                    | 0.49            |

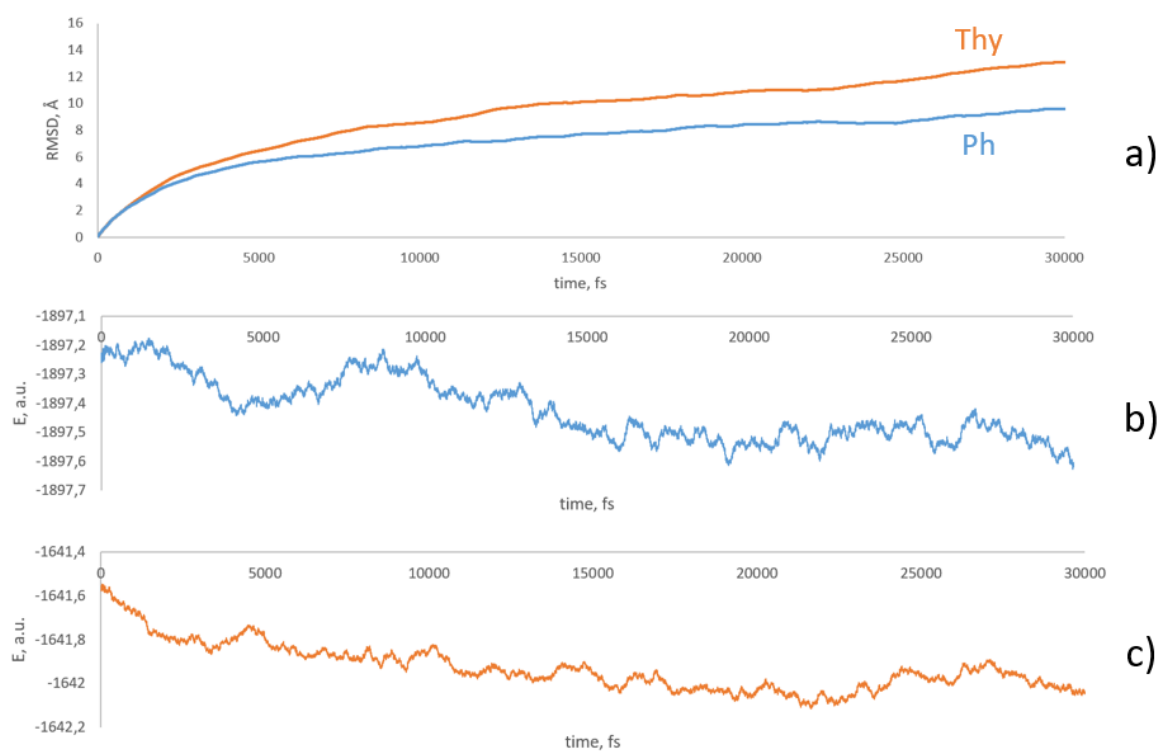

**g. S10.** Dependence of RMSD (a) and total energy of the system (b – Ph, c – Thy) on the simulation time. **Fi**

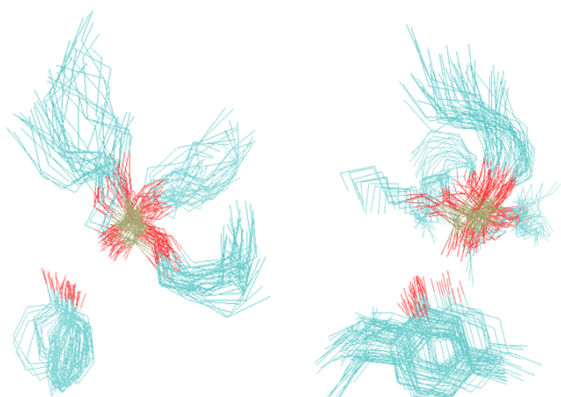

**Fig. S11.** The geometry of the “-OH...O=” type dimers for Ph and Thy.

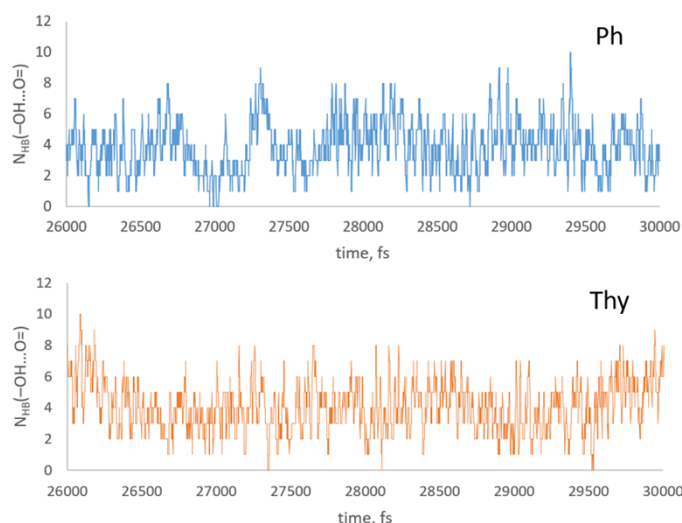

**Fig. S12.** Dependence of the number of hydrogen bonds of the “–OH...O=” type on the simulation time for Ph and Thy.

### Combined DFT+D and DLPNO-CCSD calculations

Below are the coordinates of the atomic nuclei of dimers (Tables S2-S6) and the values of the total electron energy calculated at the theoretical level DLPNO-CCSD(T)/def2-TZVP.

**Table S9.** Men/TBP. E = -1581.640345295498 a.u.

|   |          |          |          |
|---|----------|----------|----------|
| O | -1.79258 | -0.19132 | 0.93179  |
| C | -5.64844 | -1.05116 | -0.63489 |
| C | -5.15530 | -1.88304 | 0.54535  |
| C | -3.64506 | -1.72247 | 0.68981  |
| C | -3.20082 | -0.26936 | 0.80658  |
| C | -3.71709 | 0.56278  | -0.37335 |
| C | -5.23318 | 0.40772  | -0.49903 |
| H | -1.40526 | -0.67427 | 0.18130  |
| P | 1.05053  | -0.83665 | -1.09950 |
| O | -0.30805 | -1.41600 | -1.12202 |
| O | 2.09714  | -1.72020 | -1.89528 |
| O | 1.62236  | -0.58482 | 0.36984  |
| O | 1.25530  | 0.59620  | -1.75240 |
| C | 3.46429  | -1.31265 | -2.09761 |
| H | 3.77800  | -1.83823 | -3.00206 |
| H | 3.49000  | -0.23750 | -2.30033 |
| C | 0.50440  | 1.72798  | -1.25790 |
| H | 0.00866  | 1.45908  | -0.31925 |
| H | -0.26355 | 1.94748  | -2.00288 |
| C | 1.29802  | -1.44700 | 1.47997  |
| H | 0.30433  | -1.87245 | 1.32512  |
| H | 2.03840  | -2.25545 | 1.50245  |
| C | 1.34466  | -0.61659 | 2.73818  |
| H | 0.58672  | 0.17037  | 2.65318  |
| H | 1.03486  | -1.25789 | 3.57299  |
| C | 2.71613  | -0.01847 | 3.02136  |
| H | 3.44638  | -0.82988 | 3.14009  |
| H | 3.03812  | 0.56057  | 2.14972  |
| C | 2.72499  | 0.86755  | 4.25774  |
| H | 2.42320  | 0.30889  | 5.14980  |
| H | 3.71821  | 1.28448  | 4.44661  |

|   |          |          |          |
|---|----------|----------|----------|
| H | 2.02869  | 1.70490  | 4.14409  |
| C | 4.34927  | -1.67648 | -0.92478 |
| H | 4.26831  | -2.75399 | -0.73934 |
| H | 3.98588  | -1.16651 | -0.02677 |
| C | 5.80285  | -1.29667 | -1.17572 |
| H | 5.86593  | -0.22152 | -1.38619 |
| H | 6.16692  | -1.80596 | -2.07673 |
| C | 6.70250  | -1.63724 | 0.00335  |
| H | 6.68165  | -2.71055 | 0.21730  |
| H | 7.74119  | -1.35645 | -0.19036 |
| H | 6.37801  | -1.11368 | 0.90839  |
| C | 1.44152  | 2.89482  | -1.06260 |
| H | 0.82761  | 3.77753  | -0.84186 |
| H | 1.95355  | 3.10091  | -2.01062 |
| C | 2.45909  | 2.67951  | 0.04923  |
| H | 1.92530  | 2.49431  | 0.98921  |
| H | 3.02669  | 1.76604  | -0.15672 |
| C | 3.40878  | 3.85556  | 0.21411  |
| H | 4.12596  | 3.67963  | 1.02079  |
| H | 3.97845  | 4.03545  | -0.70365 |
| H | 2.86465  | 4.77622  | 0.44925  |
| C | -3.24531 | 2.02613  | -0.30870 |
| C | -3.36300 | 2.71278  | -1.66567 |
| H | -2.84164 | 2.14599  | -2.44419 |
| H | -4.40795 | 2.81728  | -1.97683 |
| H | -2.93298 | 3.71944  | -1.63507 |
| C | -3.94233 | 2.84945  | 0.77096  |
| H | -5.00024 | 3.00806  | 0.53793  |
| H | -3.88114 | 2.37237  | 1.75334  |
| H | -3.47713 | 3.83650  | 0.85698  |
| H | -5.60074 | 0.98485  | -1.35423 |
| H | -3.60137 | 0.14967  | 1.73910  |
| H | -3.26084 | 0.12079  | -1.27405 |
| H | -5.62734 | -1.48089 | 1.45504  |
| H | -3.28031 | -2.27341 | 1.56421  |
| H | -5.71775 | 0.83039  | 0.39092  |
| H | -6.73879 | -1.12955 | -0.71895 |
| H | -5.23076 | -1.46890 | -1.56197 |
| H | -3.15098 | -2.16216 | -0.18941 |
| C | -5.54826 | -3.34706 | 0.41172  |
| H | -5.21077 | -3.93081 | 1.27383  |
| H | -6.63380 | -3.46245 | 0.33031  |
| H | -5.09719 | -3.78707 | -0.48480 |
| H | -2.18275 | 1.98080  | -0.04728 |

**Table S10.** Ph/TBP. E = -1421.08970875498 a.u.

|   |            |             |             |
|---|------------|-------------|-------------|
| O | 2.80515100 | -1.27908100 | -1.50334800 |
| C | 6.04527300 | 1.15884500  | -0.64974600 |
| C | 6.19491000 | -0.21759600 | -0.79821100 |
| H | 7.17418500 | -0.67142500 | -0.68194100 |
| C | 5.10389100 | -1.02308900 | -1.08779600 |
| H | 5.20870000 | -2.09690400 | -1.19751400 |
| C | 3.83590300 | -0.45730300 | -1.23515700 |
| C | 3.68111500 | 0.92524000  | -1.09880700 |
| H | 2.69490000 | 1.36041800  | -1.22227200 |
| C | 4.78271600 | 1.71984700  | -0.80524000 |
| H | 4.64886700 | 2.79204900  | -0.69849200 |
| H | 1.96488900 | -0.78280000 | -1.46332900 |

|   |             |             |             |
|---|-------------|-------------|-------------|
| H | 6.90102500  | 1.78379000  | -0.41987900 |
| P | -0.61501600 | -0.30754600 | -0.21404800 |
| O | 0.49113700  | 0.11895500  | -1.09762000 |
| O | -1.33716900 | -1.59811600 | -0.77485800 |
| O | -1.71535400 | 0.83253100  | 0.00734000  |
| O | -0.28532800 | -0.72114900 | 1.27680100  |
| C | -2.43150200 | -2.24302700 | -0.09426200 |
| H | -2.30567100 | -3.30760900 | -0.30270200 |
| H | -2.32682200 | -2.09174100 | 0.98442000  |
| C | 0.19016900  | 0.22081500  | 2.26555700  |
| H | -0.06987400 | -0.24333400 | 3.21957900  |
| H | -0.38040600 | 1.14887200  | 2.16401900  |
| C | -2.06836500 | 1.71174600  | -1.07993200 |
| H | -1.15122200 | 2.13178100  | -1.50059900 |
| H | -2.56901900 | 1.12203300  | -1.85730900 |
| C | -2.98441200 | 2.78220100  | -0.53988000 |
| H | -2.45555700 | 3.34001800  | 0.24228000  |
| H | -3.17731800 | 3.49234900  | -1.35375700 |
| C | -4.30288300 | 2.24586900  | 0.00160600  |
| H | -4.81682400 | 1.69059400  | -0.79380000 |
| H | -4.09359000 | 1.52334100  | 0.79771800  |
| C | -5.21158000 | 3.34600200  | 0.52841000  |
| H | -5.45663900 | 4.06830200  | -0.25702400 |
| H | -6.15173900 | 2.93957700  | 0.91088900  |
| H | -4.73167400 | 3.89616500  | 1.34420100  |
| C | -3.76320300 | -1.73810000 | -0.60206700 |
| H | -3.80441800 | -1.87758100 | -1.68852800 |
| H | -3.83230100 | -0.66226900 | -0.41159800 |
| C | -4.93588900 | -2.44792200 | 0.06184600  |
| H | -4.86538200 | -2.32733400 | 1.15017700  |
| H | -4.87028800 | -3.52582800 | -0.13089600 |
| C | -6.27941000 | -1.92186200 | -0.42189500 |
| H | -6.38858800 | -2.05527800 | -1.50281600 |
| H | -7.11093100 | -2.43996200 | 0.06306600  |
| H | -6.38220500 | -0.85292000 | -0.20853600 |
| C | 1.67957300  | 0.45979900  | 2.17229800  |
| H | 1.93055900  | 1.17038000  | 2.97171500  |
| H | 1.92210300  | 0.95824100  | 1.22743200  |
| C | 2.52012400  | -0.80152300 | 2.32215000  |
| H | 2.17191500  | -1.36419300 | 3.19877600  |
| H | 2.35637700  | -1.44826600 | 1.45435500  |
| C | 4.00335100  | -0.49337500 | 2.46261100  |
| H | 4.59319000  | -1.41089400 | 2.53384600  |
| H | 4.37454800  | 0.06841200  | 1.60145300  |
| H | 4.19827600  | 0.10068700  | 3.36234800  |

**Table S11.** PTBP/TBP. E = -1578.03463545115 a.u.

|   |         |          |          |
|---|---------|----------|----------|
| O | 1.48997 | -1.75398 | -1.60031 |
| C | 5.03109 | 0.19507  | -0.54733 |
| C | 4.96221 | -1.19079 | -0.73363 |
| H | 5.85105 | -1.79770 | -0.58888 |
| C | 3.78618 | -1.82866 | -1.08765 |
| H | 3.75007 | -2.90506 | -1.21646 |
| C | 2.61549 | -1.09137 | -1.27326 |
| C | 2.66398 | 0.29197  | -1.11290 |
| H | 1.76155 | 0.87509  | -1.26524 |
| C | 3.85567 | 0.91425  | -0.75233 |
| H | 3.84913 | 1.99136  | -0.62989 |

|   |          |          |          |
|---|----------|----------|----------|
| H | 0.72546  | -1.14897 | -1.55014 |
| P | -1.74492 | -0.36730 | -0.23951 |
| O | -0.61365 | -0.06132 | -1.14073 |
| O | -2.59923 | -1.58528 | -0.77688 |
| O | -2.72405 | 0.87877  | -0.01760 |
| O | -1.43956 | -0.79656 | 1.25233  |
| C | -3.74159 | -2.11344 | -0.07527 |
| H | -3.72611 | -3.18642 | -0.27803 |
| H | -3.60528 | -1.96739 | 1.00060  |
| C | -0.85179 | 0.10158  | 2.22113  |
| H | -1.17432 | -0.29908 | 3.18493  |
| H | -1.29605 | 1.09312  | 2.09208  |
| C | -3.00156 | 1.77745  | -1.11057 |
| H | -2.05265 | 2.09777  | -1.54821 |
| H | -3.57033 | 1.23330  | -1.87425 |
| C | -3.79678 | 2.94103  | -0.57161 |
| H | -3.20310 | 3.45049  | 0.19691  |
| H | -3.92818 | 3.65848  | -1.39134 |
| C | -5.15502 | 2.54714  | -0.00658 |
| H | -5.73401 | 2.03888  | -0.78860 |
| H | -5.00876 | 1.81523  | 0.79503  |
| C | -5.93975 | 3.73921  | 0.51941  |
| H | -6.12134 | 4.47475  | -0.27097 |
| H | -6.91080 | 3.43436  | 0.91879  |
| H | -5.39500 | 4.24597  | 1.32251  |
| C | -5.02410 | -1.48078 | -0.56651 |
| H | -5.09563 | -1.62096 | -1.65133 |
| H | -4.98263 | -0.40247 | -0.38216 |
| C | -6.25138 | -2.06681 | 0.11911  |
| H | -6.15251 | -1.94873 | 1.20550  |
| H | -6.29660 | -3.14678 | -0.06787 |
| C | -7.54301 | -1.41157 | -0.34798 |
| H | -7.68124 | -1.53811 | -1.42641 |
| H | -8.41459 | -1.84210 | 0.15207  |
| H | -7.53561 | -0.33679 | -0.13939 |
| C | 0.65625  | 0.14156  | 2.13229  |
| H | 0.99560  | 0.83834  | 2.91101  |
| H | 0.96471  | 0.57271  | 1.17377  |
| C | 1.32362  | -1.21346 | 2.32794  |
| H | 0.90480  | -1.69565 | 3.22152  |
| H | 1.07524  | -1.86145 | 1.48134  |
| C | 2.83460  | -1.09864 | 2.46240  |
| H | 3.29896  | -2.08218 | 2.57164  |
| H | 3.27449  | -0.62484 | 1.58120  |
| H | 3.10726  | -0.50083 | 3.33941  |
| C | 6.34647  | 0.84455  | -0.12661 |
| C | 6.78389  | 0.27086  | 1.22858  |
| H | 6.92853  | -0.81166 | 1.17866  |
| H | 7.72892  | 0.72253  | 1.54968  |
| H | 6.02852  | 0.47070  | 1.99454  |
| C | 6.22011  | 2.36096  | 0.01542  |
| H | 7.18377  | 2.78328  | 0.31602  |
| H | 5.93031  | 2.83262  | -0.92849 |
| H | 5.48500  | 2.63565  | 0.77814  |
| C | 7.42580  | 0.54946  | -1.17689 |
| H | 8.37901  | 1.00346  | -0.88474 |
| H | 7.58903  | -0.52490 | -1.29595 |
| H | 7.13690  | 0.95314  | -2.15175 |

**Table S12.** Thy/TBP. E = -1578.03793271864 a.u.

|   |          |          |          |
|---|----------|----------|----------|
| O | 2.20784  | -1.02308 | -1.09570 |
| C | 5.10034  | 1.82521  | -0.35866 |
| C | 5.39438  | 0.46553  | -0.28334 |
| H | 6.40005  | 0.16354  | -0.01017 |
| C | 4.43737  | -0.51111 | -0.52632 |
| C | 3.14346  | -0.07754 | -0.86516 |
| C | 2.84625  | 1.28066  | -0.94623 |
| H | 1.83360  | 1.57505  | -1.20807 |
| C | 3.81751  | 2.24768  | -0.68980 |
| H | 1.32762  | -0.60746 | -1.17458 |
| H | 5.87485  | 2.55774  | -0.15289 |
| P | -1.34885 | -0.25548 | -0.12255 |
| O | -0.25334 | 0.16255  | -1.02296 |
| O | -1.91312 | -1.67843 | -0.52148 |
| O | -2.56637 | 0.78209  | -0.09334 |
| O | -1.04556 | -0.42889 | 1.42026  |
| C | -2.96365 | -2.33987 | 0.21011  |
| H | -2.72622 | -3.40383 | 0.14483  |
| H | -2.91445 | -2.04315 | 1.26223  |
| C | -0.70852 | 0.68112  | 2.28351  |
| H | -0.98450 | 0.33353  | 3.28168  |
| H | -1.34685 | 1.53089  | 2.02349  |
| C | -2.95709 | 1.46619  | -1.30112 |
| H | -2.06796 | 1.91563  | -1.75058 |
| H | -3.36668 | 0.72936  | -2.00261 |
| C | -3.99306 | 2.50207  | -0.93989 |
| H | -3.55231 | 3.21152  | -0.22921 |
| H | -4.22071 | 3.07191  | -1.84949 |
| C | -5.27422 | 1.91366  | -0.36401 |
| H | -5.69991 | 1.20640  | -1.08768 |
| H | -5.02804 | 1.33079  | 0.53002  |
| C | -6.30525 | 2.97740  | -0.01913 |
| H | -6.58752 | 3.55802  | -0.90337 |
| H | -7.21621 | 2.53353  | 0.39135  |
| H | -5.91369 | 3.67882  | 0.72466  |
| C | -4.31893 | -2.04266 | -0.39101 |
| H | -4.30549 | -2.32164 | -1.45101 |
| H | -4.50122 | -0.96427 | -0.34307 |
| C | -5.43959 | -2.78015 | 0.33010  |
| H | -5.42245 | -2.51649 | 1.39506  |
| H | -5.26021 | -3.86120 | 0.28017  |
| C | -6.80946 | -2.46084 | -0.25068 |
| H | -6.86397 | -2.74013 | -1.30763 |
| H | -7.60320 | -2.99665 | 0.27652  |
| H | -7.02576 | -1.38989 | -0.18003 |
| C | 0.75899  | 1.03718  | 2.22565  |
| H | 0.90452  | 1.86673  | 2.93119  |
| H | 1.01470  | 1.42488  | 1.23338  |
| C | 1.69035  | -0.11337 | 2.58504  |
| H | 1.32919  | -0.59687 | 3.50271  |
| H | 1.64449  | -0.87161 | 1.79691  |
| C | 3.12765  | 0.34720  | 2.77500  |
| H | 3.78939  | -0.49725 | 2.98582  |
| H | 3.50641  | 0.84349  | 1.87778  |
| H | 3.20785  | 1.05117  | 3.61074  |
| C | 4.71934  | -1.99326 | -0.45119 |
| H | 3.83200  | -2.45472 | -0.00120 |
| C | 5.92402  | -2.34265 | 0.41357  |

|   |         |          |          |
|---|---------|----------|----------|
| H | 5.84352 | -1.90568 | 1.41342  |
| H | 6.00554 | -3.42822 | 0.52219  |
| H | 6.85990 | -1.99241 | -0.03474 |
| C | 4.87057 | -2.58101 | -1.85733 |
| H | 5.01279 | -3.66602 | -1.81206 |
| H | 3.98389 | -2.37650 | -2.46094 |
| H | 5.73946 | -2.14411 | -2.36113 |
| C | 3.46873 | 3.70597  | -0.76995 |
| H | 3.11178 | 3.97381  | -1.76963 |
| H | 2.67344 | 3.96269  | -0.06200 |
| H | 4.33433 | 4.33242  | -0.54307 |

**Table S13.** BHT/TBP. E = -1774.20815068261 a.u.

|   |          |          |          |
|---|----------|----------|----------|
| O | 1.88764  | 0.65548  | -1.96469 |
| C | 4.29870  | 0.42567  | 1.42508  |
| C | 4.25783  | -0.61770 | 0.50915  |
| H | 4.86778  | -1.49088 | 0.70687  |
| C | 3.46729  | -0.57746 | -0.63875 |
| C | 2.68487  | 0.57584  | -0.85256 |
| C | 2.76052  | 1.68553  | 0.01280  |
| C | 3.56111  | 1.56950  | 1.14911  |
| H | 1.01441  | 0.26211  | -1.77677 |
| P | -1.64455 | -0.68739 | -0.46481 |
| O | -0.58242 | -0.31991 | -1.42098 |
| O | -2.56270 | -1.83931 | -1.04499 |
| O | -2.58015 | 0.54182  | -0.04924 |
| O | -1.23455 | -1.25809 | 0.95127  |
| C | -3.65150 | -2.41812 | -0.29948 |
| H | -3.71537 | -3.44931 | -0.65353 |
| H | -3.39079 | -2.43711 | 0.76317  |
| C | -0.51243 | -0.46662 | 1.92563  |
| H | -1.09004 | -0.55250 | 2.85022  |
| H | -0.51188 | 0.58104  | 1.61519  |
| C | -2.95590 | 1.53295  | -1.02642 |
| H | -2.07179 | 1.81106  | -1.60480 |
| H | -3.69337 | 1.08683  | -1.70460 |
| C | -3.53816 | 2.71553  | -0.29283 |
| H | -2.77255 | 3.12524  | 0.37663  |
| H | -3.75215 | 3.49335  | -1.03657 |
| C | -4.80115 | 2.38649  | 0.49187  |
| H | -5.55458 | 1.98024  | -0.19572 |
| H | -4.57655 | 1.59026  | 1.20962  |
| C | -5.36947 | 3.59445  | 1.22088  |
| H | -5.62523 | 4.39638  | 0.52069  |
| H | -6.27518 | 3.33747  | 1.77687  |
| H | -4.64511 | 3.99935  | 1.93494  |
| C | -4.94815 | -1.67779 | -0.54213 |
| H | -5.13936 | -1.64285 | -1.62105 |
| H | -4.84018 | -0.64394 | -0.19851 |
| C | -6.12163 | -2.33201 | 0.17541  |
| H | -5.90429 | -2.39128 | 1.24927  |
| H | -6.23415 | -3.36678 | -0.17108 |
| C | -7.42472 | -1.57574 | -0.03847 |
| H | -7.68113 | -1.52580 | -1.10145 |
| H | -8.25721 | -2.05597 | 0.48251  |
| H | -7.34738 | -0.54829 | 0.33165  |
| C | 0.88988  | -0.99354 | 2.09526  |
| H | 1.39265  | -0.35198 | 2.83018  |

|   |         |          |          |
|---|---------|----------|----------|
| H | 1.44176 | -0.86433 | 1.15890  |
| C | 0.93863 | -2.44644 | 2.54603  |
| H | 0.36884 | -2.55768 | 3.47831  |
| H | 0.42941 | -3.06657 | 1.80053  |
| C | 2.36057 | -2.94644 | 2.74832  |
| H | 2.37621 | -3.99386 | 3.06203  |
| H | 2.93804 | -2.86074 | 1.82376  |
| H | 2.88206 | -2.36007 | 3.51207  |
| C | 3.47376 | -1.75185 | -1.62599 |
| C | 4.49022 | -2.82510 | -1.22339 |
| H | 4.24759 | -3.28813 | -0.26165 |
| H | 4.48276 | -3.61762 | -1.97730 |
| H | 5.50820 | -2.42740 | -1.17082 |
| C | 3.86788 | -1.26215 | -3.02774 |
| H | 3.88850 | -2.10902 | -3.72239 |
| H | 3.16671 | -0.51811 | -3.40259 |
| H | 4.86810 | -0.81777 | -3.00751 |
| C | 2.09746 | -2.43195 | -1.66726 |
| H | 1.80755 | -2.77725 | -0.66910 |
| H | 1.31165 | -1.77557 | -2.03718 |
| H | 2.13955 | -3.30776 | -2.32404 |
| C | 2.03832 | 3.00346  | -0.29781 |
| C | 2.35200 | 4.08474  | 0.74033  |
| H | 2.00956 | 3.80791  | 1.74256  |
| H | 3.42176 | 4.30801  | 0.78881  |
| H | 1.83450 | 5.00675  | 0.45891  |
| C | 2.50344 | 3.53350  | -1.66322 |
| H | 3.58490 | 3.70091  | -1.65663 |
| H | 2.26644 | 2.83162  | -2.46190 |
| H | 2.01444 | 4.49055  | -1.87678 |
| C | 0.51557 | 2.81591  | -0.30214 |
| H | 0.02568 | 3.77118  | -0.52289 |
| H | 0.19750 | 2.08747  | -1.04551 |
| H | 0.16729 | 2.48423  | 0.68172  |
| C | 5.11103 | 0.31282  | 2.68287  |
| H | 6.02130 | -0.27030 | 2.51957  |
| H | 5.40161 | 1.29645  | 3.06064  |
| H | 4.54279 | -0.18860 | 3.47539  |
| H | 3.62840 | 2.39883  | 1.84323  |

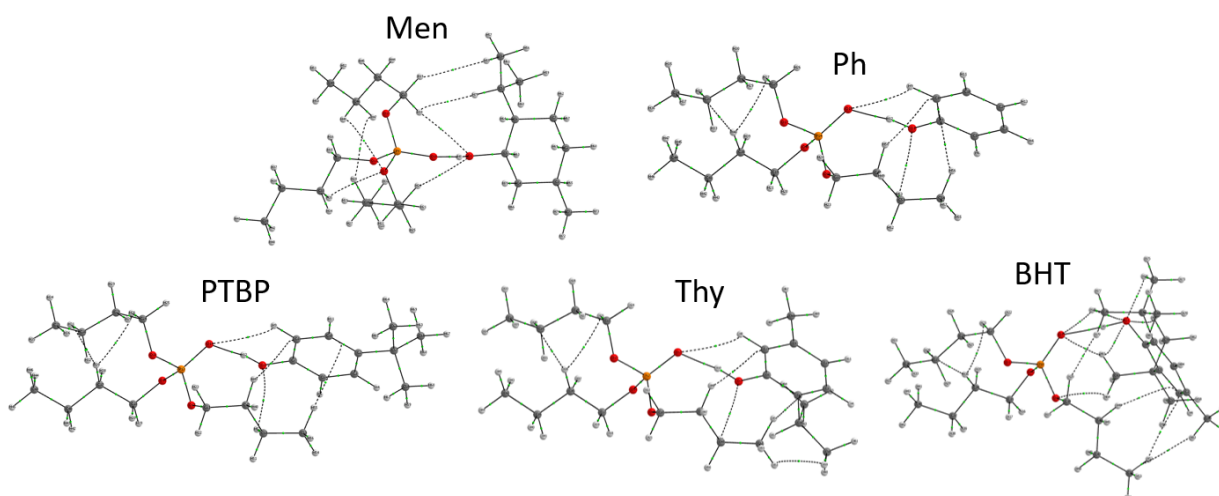

**Fig. S13.** Atomic bonding graphs for associates of TBP. Small green spheres denote (3,-1) critical points of electron density.
